# Supplementary material for: Development of a Specific Nested PCR Assay for the Detection of 16SrI Group Phytoplasmas Associated with Sisal Purple Leafroll Disease in Sisal Plants and Mealybugs
Source: MDPI journal article supplement (doi:10.3390/plants11212817), 2022-10-23
Supplement: s1 [file s1]

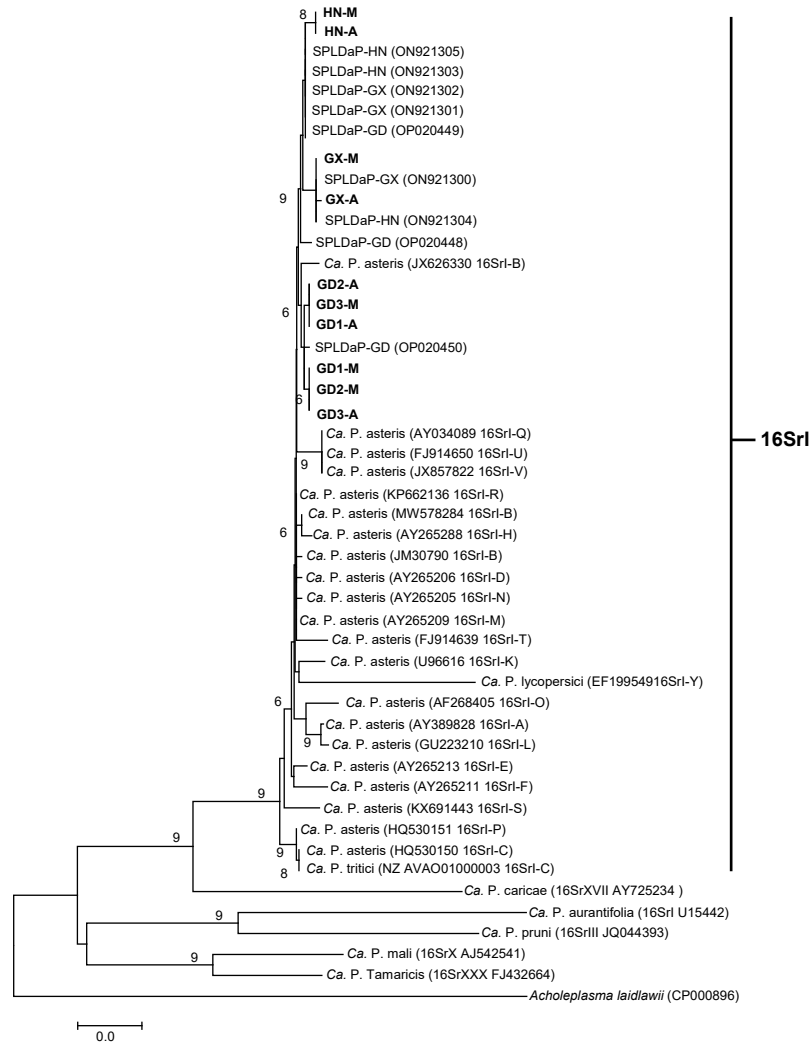

**Figure S3.** A phylogenetic tree constructed of 16S rRNA gene sequences from phytoplasma by the neighbor-joining method using MEGA 6. Numbers on branches are the bootstrap values (1000 replicates). GenBank accession numbers are given in parentheses, and *Acholeplasma Laidlawii* was the outgroup. The bold represented the F2nR2 regions sequences of 16Sr RNA gene amplified from SPLDaP in SPLD leaf samples (-A) and corresponding mealybugs samples (-M) from Hainan (HN), Guangdong (GD) and Guangxi (GX).
