# Supplementary material for: Development of a Specific Nested PCR Assay for the Detection of 16SrI Group Phytoplasmas Associated with Sisal Purple Leafroll Disease in Sisal Plants and Mealybugs
Source: MDPI journal article supplement (doi:10.3390/plants11212817), 2022-10-23
Supplement: s1 [file s1]

|                         | Region 1 (ASF1)                     | Region 2 (ASF2)                 | Region 3 (ASR1)                         | Region 4 (ASR2)             |
|-------------------------|-------------------------------------|---------------------------------|-----------------------------------------|-----------------------------|
| ASS1 (MW364375)         | C---AATA-G-----GTATGCTTAGGGAG-GAG   | TAGGGAAG-AAT-----AAATGATGAAAA   | TAAACGTTGGGT---A---AAAC---CAGTG         | ACACAGTGGAG---GTTATCAGTTGC  |
| SPLDaP1 (OP020448)      | .....                               | .....                           | .....                                   | .....                       |
| SPLDaP2 (OP020449)      | .....                               | .....                           | .....                                   | .....                       |
| SPLDaP3 (OP020450)      | .....                               | .....                           | .....                                   | .....                       |
| SPLDaP4 (ON921300)      | .....                               | .....                           | .....                                   | .....                       |
| SPLDaP5 (ON921301)      | .....                               | .....                           | .....                                   | .....                       |
| SPLDaP6 (ON921302)      | .....                               | .....                           | .....                                   | .....                       |
| SPLDaP7 (ON921303)      | .....                               | .....                           | .....                                   | .....                       |
| SPLDaP8 (ON921304)      | .....                               | .....                           | .....                                   | .....                       |
| SPLDaP9 (ON921305)      | .....                               | .....                           | .....                                   | .....                       |
| 16SrI-A (AY389828)      | T.....                              | .....                           | .....                                   | .....                       |
| 16SrI-C (HQ530150)      | .....                               | .....                           | .....                                   | .....                       |
| 16SrI-D (AY265206)      | .....                               | .....                           | .....                                   | .....                       |
| 16SrI-E (AY265213)      | .....A..                            | .....                           | .....                                   | .....                       |
| 16SrI-F (AY265211)      | .....                               | .....                           | .....                                   | .....                       |
| 16SrI-H (AY265288)      | .....                               | .....                           | .....                                   | T.....                      |
| 16SrI-K (U96616)        | .....                               | .....                           | .....                                   | .....                       |
| 16SrI-L (GU223210)      | .....                               | .....                           | .....                                   | .....                       |
| 16SrI-M (AY265209)      | T.....                              | .....                           | .....                                   | .....                       |
| 16SrI-N (AY265205)      | .....                               | .....                           | .....                                   | .....                       |
| 16SrI-O (AF268405)      | .....                               | .....                           | .....                                   | .....                       |
| 16SrI-P (EU333397)      | T.....                              | .....                           | .....                                   | .....                       |
| 16SrI-Q (AY034089)      | .....                               | .....                           | .....                                   | .....                       |
| 16SrI-R (KP662136)      | .....                               | .....                           | .....                                   | .....                       |
| 16SrI-S (KX691443)      | .....                               | .....                           | .....                                   | .....                       |
| 16SrI-T (FJ914639)      | .....                               | .....                           | .....                                   | .....                       |
| 16SrI-U (FJ914650)      | .....                               | .....                           | .....                                   | .....                       |
| 16SrI-V (JX857822)      | .....                               | .....                           | .....                                   | .....                       |
| 16SrII-A (JX403944)     | TTA.TA.....TA.....G.                | CGA.....A.....GCAA.....CG.      | ..GT..C.....T.T.....G..A                | T.TC.....C.....GAAA         |
| 16SrIII-A (JN903385)    | TTTGAA.....A.....G.                 | ..A.....A.....GA.....           | ..GT..C.....A.....CT.....G..A           | T.T.A.....C.....GGAA        |
| 16SrIV-A (KX982668)     | TTTCGGA.....A.....G.                | ..GAA.....AC.....AG.....        | ..GT..C.....G..T.....CT.....G..A        | T.T.....GGAT                |
| 16SrV-A (AY197658)      | TTTCGGAG.....AA.....G.              | ..GAA.....A.....A.....          | ..GT..C.....G.....CT.....G..A           | T.T.....GG.A                |
| 16SrVI-A (AF409070)     | TTACGA.....AA.....G.                | ..GAA.....A.....G.A.....        | ..GT..C.....G..TA.....CT.....G..A       | T.T.....GG.A                |
| 16SrVII-A (AF105317)    | TTTCGAA.....AA.T.....               | ..GAA.....A.....A.....          | ..GT..C.....A..TA.....CT.....G..A       | T.T.....GG.A                |
| 16SrVIII-A (AF248956)   | TAA..AA.....AA.....G.               | ..GAA.....A.....A.....          | ..GT..CA..G..TA.....CT.....TG..A        | T.T.A.....GG.A              |
| 16SrIX-A (KJ817873)     | TTTCG.A.....A.....G.                | ..GAAA.....A.....A.....         | ..GT..C.....TTC..G.CT.....G..A          | T.T.A.A.....GAAT            |
| 16SrX-A (AF248958)      | A...AG.....AA.A.T..G.               | ..AA.....A.....A.....           | ..GT.....T.....C.....G                  | T.T.....GG.A                |
| 16SrXI-A (AB052873)     | TTTCGAA.....A.....G.                | ..GAA.....A.....A.....          | ..GT..C.....G.....CT.....G..A           | T.T.....GG.A                |
| 16SrXII (AY739654)      | .....A.....G.                       | ..A.....A.....T.....            | ..GT.....A.....                         | T.....GAAG                  |
| 16SrXIII-A (AF248960)   | .....A.....G.                       | ..A.....A.....G.....            | ..G.....T.....                          | T.....GTTG                  |
| 16SrXIV-A (AJ550984)    | TTTCG.A.....A.....G.                | ..GAA.....A.....A.....          | ..GT..C.....G.....CT.....G..A           | T.T.....GG.A                |
| 16SrXV-A (AF147708)     | TTTCGGA.....AA.....G.               | ..GAA.....A.....A.TA.....       | ..GT..C.....G..TT.....CT.....G..A       | T.T.....GG.A                |
| 16SrXVI-A (AY725228)    | TTTCGGAG.....AA.....G.              | C.AA.....A.....GCAA.....CG.     | ..GT..C.....TC.....G..A                 | T.TC.....GAAA               |
| 16SrXVII-A (AY725234)   | T.A.T.....GT.A.....G.               | ..A.....A.....GA.....           | ..GT.....A.....                         | T.....GAAG                  |
| 16SrXVIII-A (DQ174122)  | .....ATG.....A.....                 | ..A.....A.....G..G..AA.T        | ..GT.....A.....                         | T.....GAAG                  |
| 16SrXIX-A (AB054986)    | .....AAC.A.....                     | ..A.....A.....G.....            | ..GT..C.....TTC..GGCT.....G..A          | T.T.A.A.....GAAT            |
| 16SrXX-A (KP851770)     | T.AG.T.....TT..G.....               | ..GAAA.....A.....A.....         | ..GT.....T.....C.....C                  | T.T.....GTTG                |
| 16SrXXI-A (AJ310849)    | TTTCG.A.....AA.....G.               | ..GAA.....A.....G..G.....TTTG   | ..GT..C.....G..TTA.....CT.....G..A      | T.T.....GG.A                |
| 16SrXXII-A (KF751387)   | TTTCGGA.....AA.....G.               | ..GAA.....A.....G..G.....       | ..GT.....T.....                         | T.....GTTG                  |
| 16SrXXIII (AY083605)    | TTTG.A.....AA.....G.                | ..GAA.....A.....CA.....         | ..GT..C.....AG.....C.....TT.....G..A    | T.T.C.....GG.A              |
| 16SrXXIV-A (AF509322)   | TTTCG.A.....AA.A.A..G.              | ..GAA.....A.....GA.....         | ..GT..C.....GTTA.....GCT.....G..A       | T.T.A.....AAAT              |
| 16SrXXV-A (AF521672)    | TTT.T.....A.....G.                  | ..A.....A.....TA.....           | ..GT..CA.....TC.....T..A                | T.T.A.C.....C.C..GAAA       |
| 16SrXXVI-A (AJ539179)   | TTT.T.....A.....G.                  | ..A.....A.....TTG.....          | ..GT.....T.....C.....                   | T.....GA.T                  |
| 16SrXXIX-A (EF666051)   | A.A.....AA.A.T..G.                  | ..GAA.....A.....TA.....         | ..GT..C.....G..TT.....CT.....G..A       | T.T.....C.G..G.A            |
| 16SrXXX-A (FJ432664)    | TTTCGGA.....AA.....G.               | ..AA.....A.....                 | ..GT.....T.....                         | T.T.....GCT.....GG.A        |
| 16SrXXXI-A (HQ225630)   | TTTCGGA.....AA.....G.               | C.T.....A.CG.CTTGTG.GAG.A.ACTG  | ..GGT.....A..GGTTTCGAT..C.....CTTG..... | T.GG.CTTTC..CTTCGGGACAGGG.A |
| 16SrXXXII-A (EU371934)  | TGA.TTT.TTCAGGGCTGTCA.....TG..T..GA | CT.T.....A.CA.AGCCTGTGAG..AA.G  | ..GGT.....GGGTAC..C.C.....CT.....       | T.G...TTCC..CTTCGGGGCAGCG.T |
| 16SrXXXIII-A (AY135523) | .GCT.....TCA..GTCA..T..GA           | CT.T.....A.CA.AGTGTG.GAAGA.AACG | ..GGT.....GGGTAC..C.C.....CT.....       | T.GTCCCTCC..CTTCGGGGCAGCG.T |
| NSQ1                    | GGA.....TCA.....A..GT               | A...A.C.A.A.....                | ..GGT..G..TCTCAAC..C..GAGAT.C.C.        | T.G.T.TCC..TTTCGGGT..CGTA   |
| NSQ2                    | GGA.....TCA.....A..GT               | A...A.C.A.A.....                | ..GGT..A..AGGTATCGACCC..TT.T...         | TGGTTCCTCTTC.TTCGGAAGCCAGAA |
| NSQ3                    | .TACATGTAA.....GC..TCA..GAA.A..G.   | C.T.....C.AA.GGCCTCTTCGCAATAGTG | ..GGT.....GGGTAC..C.C.....CT.....       | TGAGCCTTCC.C.TTCGGGGCAGCG.T |
| NSQ4                    | .GCT.....CCG..GTTC..T..GA           | C.T.....A.CA.AGCCTGTGAG..AA.G   | ..GGT.....GGGTAC..C.C.....CT.....       | T.G..CTTTC.C.TTCGGGGCAGCG.T |
| NSQ5                    | .GCA.T.....CTGTCA.....T..GA         | CT.T.....A.CA.AGTGTG.GAAGA.AATG | ..GGT..G..TCTCAAC..C..GAGAT.C.C.        | TG.G...TCC..TTTCGGGT..CGTA  |
| NSQ6                    | .GCT.....TCA..GTTA..T..GA           | CT.T..C.A..C.AGTGCGTGAG..AA.G   | ..GGT.....GGGTAC..C.C.....CT.....       | T.G...TCC..TTTCGGGT..CGTA   |
| NSQ7                    | .GCC.....TCA..GTTA..T..GA           | CT.T..C.A.CA.AGCCTGTGAG.AAAATG  | ..GGT.....GGGTAC..C.C.....CT.....       | T.G...TTCC.C.TTCGGGGCAGCG.T |
| NSQ8                    | .GCC.....TCA--GTCA..T..GA           |                                 |                                         |                             |
| NSQ9                    |                                     |                                 |                                         |                             |
| NSQ10                   |                                     |                                 |                                         |                             |
| NSQ11                   |                                     |                                 |                                         |                             |

**Figure S1.** Alignment of 16S rRNA gene nucleotide sequences from 10 SPLDaP (16SrI-B) (ASS1, SPLDaP1 to SPLDaP9), 18 subgroups of 16SrI (-A,-C to -V), 30 representative 16Sr groups (16SrII to 16SrXXXIII), as well as 11 non-target bacterial species (NSQ1- NSQ11) amplified from the sisal in the 5'-to-3' direction, and four regions (1-4) of sequence polymorphism were trimmed. The primers ASR1 and ASR2 is the reverse compliment to the region (3, 4) highlighted in Figure S1. '----' represented spacer sequence, '...' represented same sequence as target primer.
