# Supplementary material for: Development of a Specific Nested PCR Assay for the Detection of 16SrI Group Phytoplasmas Associated with Sisal Purple Leafroll Disease in Sisal Plants and Mealybugs
Source: MDPI journal article supplement (doi:10.3390/plants11212817), 2022-10-23
Supplement: s1 [file s1]

**Table S2.** The numbers of sisal samples collected in south China between 2018 and 2021.

| Location           | Collected Area | Number of samples   |                      |
|--------------------|----------------|---------------------|----------------------|
|                    |                | Symptomatic samples | Asymptomatic samples |
| Hainan Province    |                |                     |                      |
| Haikou City        | Epidemic       | 15                  | 10                   |
| Changjiang Country | Epidemic       | 5                   | 5                    |
| Guangdong Province |                |                     |                      |
| Xuwen Country      | Epidemic       | 20                  | 20                   |
| Leizhou Country    | Epidemic       | 10                  | 10                   |
| Zhanjiang City     | Non-epidemic   | - <sup>1</sup>      | 10                   |
| Guangxi Province   |                |                     |                      |
| Qinzhou City       | Epidemic       | 30                  | 20                   |
| Chongzuo City      | Non-epidemic   | -                   | 10                   |
| Nanning City       | Non-epidemic   | -                   | 10                   |

<sup>1</sup> No samples were collected.
