# Supplementary material for: Development of a Specific Nested PCR Assay for the Detection of 16SrI Group Phytoplasmas Associated with Sisal Purple Leafroll Disease in Sisal Plants and Mealybugs
Source: MDPI journal article supplement (doi:10.3390/plants11212817), 2022-10-23
Supplement: s1 [file s1]

**Table S1.** 28S gene sequence identities of mealybugs in this study and other mealybug species.

| <b>Species</b>                       | <b>GenBank Accession nos.</b> | <b>Sequences identity (%) to mealybugs in this study</b> |
|--------------------------------------|-------------------------------|----------------------------------------------------------|
| <i>Dysmicoccus neobrevipes</i>       | KX015048                      | 99.68%                                                   |
| <i>Dysmicoccus neobrevipes</i>       | KX015042                      | 99.68%                                                   |
| <i>Dysmicoccus neobrevipes</i>       | KX015055                      | 99.68%                                                   |
| <i>Dysmicoccus neobrevipes</i>       | KX015040                      | 99.68%                                                   |
| <i>Planococcus citri</i>             | GU134660                      | 99.68%                                                   |
| <i>Dysmicoccus brevipes</i>          | GU134658                      | 94.43%                                                   |
| <i>Pseudococcus viburni</i>          | GU134653                      | 94.39%                                                   |
| <i>Pseudococcus viburni</i>          | GU134652                      | 94.08%                                                   |
| <i>Pseudococcus nr maritimus</i>     | GU134655                      | 93.17%                                                   |
| <i>Pseudococcus calceolariae</i>     | GU168802                      | 90.31%                                                   |
| <i>Pseudococcus longispinus</i>      | GU134657                      | 90.06%                                                   |
| <i>Pseudococcus nr microadonidum</i> | GU134656                      | 90.06%                                                   |
| <i>Pseudococcus comstocki</i>        | GU134654                      | 89.81%                                                   |
| <i>Vryburgia rimariae</i>            | GU134659                      | 86.05%                                                   |
| <i>Planococcus minor</i>             | GU134661                      | 85.14%                                                   |
| <i>Planococcus ficus</i>             | GU134662                      | 84.88%                                                   |
| <i>Phenacoccus parvus</i>            | GU134663                      | 77.84%                                                   |
