# Supplementary material for: Development of a Specific Nested PCR Assay for the Detection of 16SrI Group Phytoplasmas Associated with Sisal Purple Leafroll Disease in Sisal Plants and Mealybugs
Source: MDPI journal article supplement (doi:10.3390/plants11212817), 2022-10-23
Supplement: s1 [file s1]

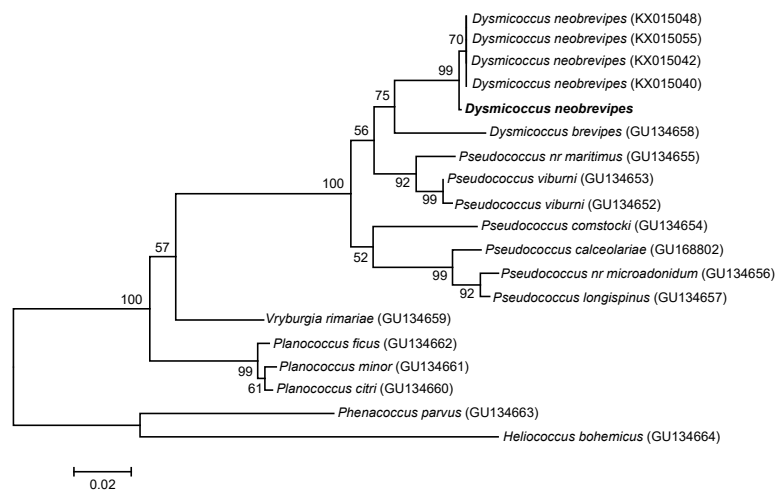

**Figure S2.** Phylogenetic analysis of mealybugs collected from sisal in South China. The 28S gene sequence of the mealybugs was amplified by PCR, and a phylogenetic tree was constructed using MEGA 6. The phylogenetic tree constructed by the neighbor-joining method. Numbers on branches are the bootstrap values (1000 replicates). The bold represented the 28S gene sequence amplified from *Dysmicoccus neobrevipes* in this study.
